# Supplementary material for: ZnIn2S4 nanosheet growth on amine-functionalized SiO2 for the photocatalytic reduction of CO2
Source: Royal Society of Chemistry journal article supplement (doi:10.1039/d1cy01740c), 2021-11-20
Supplement: d1cy01740c1.pdf [file d1cy01740c1.pdf]

## Supporting Information

### ZnIn<sub>2</sub>S<sub>4</sub> nanosheet growth on amine-functionalized SiO<sub>2</sub> for the photocatalytic reduction of CO<sub>2</sub>

Yuqing Shao,<sup>a</sup> Zhaolin Dou,<sup>b</sup> Xiaoyu Liang,<sup>a</sup> Xinxin Zhang,<sup>a</sup> Min Ji,<sup>a</sup> Min Pang,<sup>c</sup> Min Wang,<sup>\*b</sup>  
Xinkui Wang,<sup>\*a</sup>

<sup>a</sup> State Key Laboratory of Fine Chemicals, Department of Chemistry, Dalian University of Technology, Dalian, 116024, Liaoning, China.

<sup>b</sup> Zhang Dayu School of Chemistry, Dalian University of Technology, Dalian 116024, Liaoning, China.

<sup>c</sup> Institute of Materials, China Academy of Engineering Physics, Mianyang, 621907, Sichuan, China

Corresponding author:

\*Min Wang

E-mail: wangmin@dlut.edu.cn

\*Xinkui Wang

E-mail: wangxinkui@dlut.edu.cn

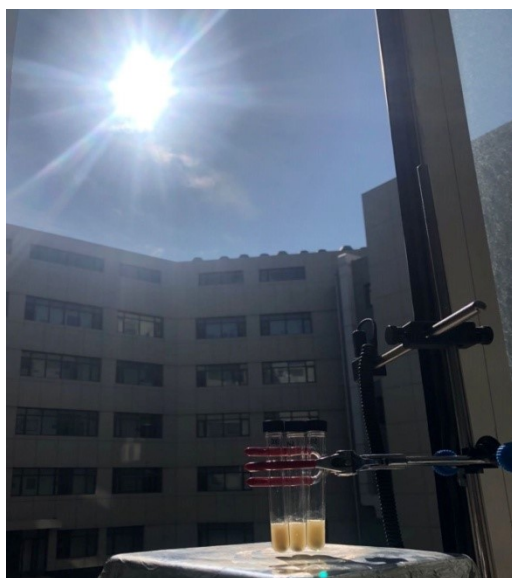

**Figure S1.** Reaction under sunlight

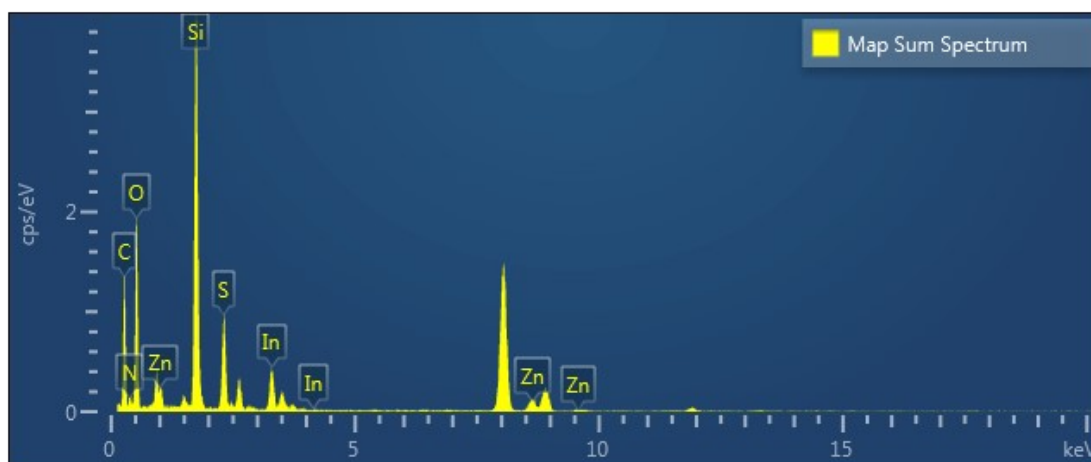

**Figure S2.** EDX spectrum of  $\text{ZnIn}_2\text{S}_4/\text{NH-SiO}_2$

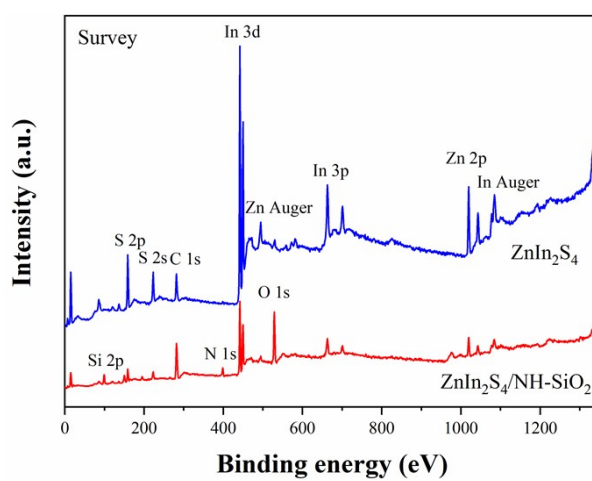

**Figure S3.** XPS survey spectra of  $\text{ZnIn}_2\text{S}_4/\text{NH-SiO}_2$  and  $\text{ZnIn}_2\text{S}_4$

**Table S1.** Elemental analysis of the samples

| Samples                                               | Atomic ratio of Zn/In/S | Atomic ratio of Zn/In/S | Atomic ratio of Zn/In/S |
|-------------------------------------------------------|-------------------------|-------------------------|-------------------------|
|                                                       | by XPS                  | by ICP                  | by EDX                  |
| ZnIn <sub>2</sub> S <sub>4</sub> /NH-SiO <sub>2</sub> | 1:2.33:4.22             | 1:2.36                  | 1:2.72:9.86             |
| ZnIn <sub>2</sub> S <sub>4</sub>                      | 1:2.04:3.54             | 1:1.85                  | -                       |

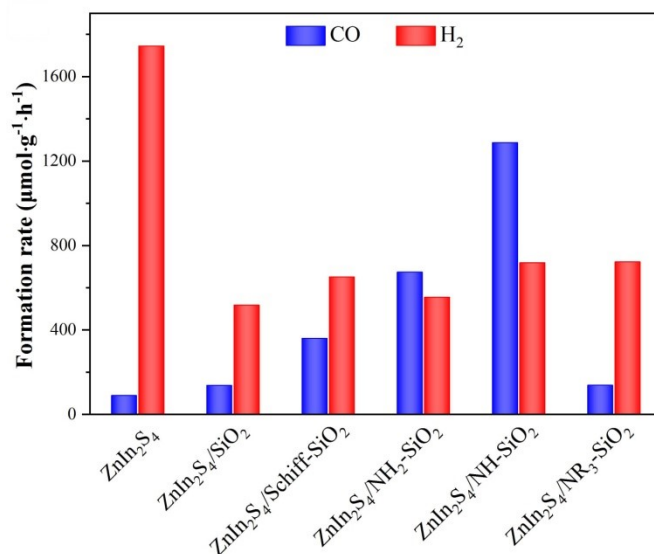

**Figure S4.** Photocatalytic activities of different amine-functionalized catalysts

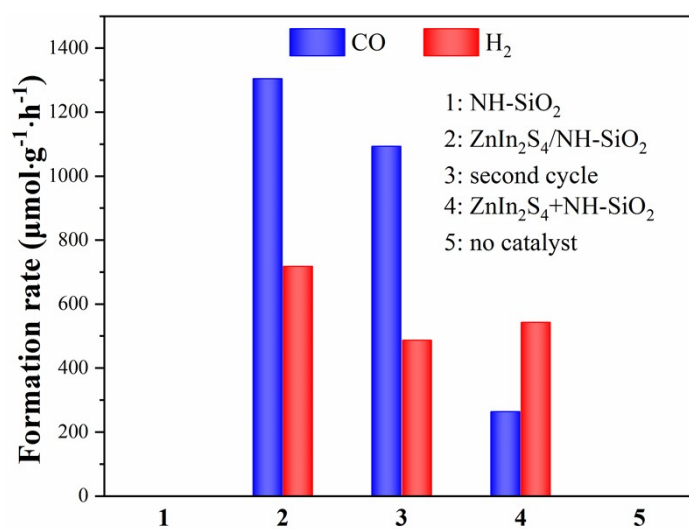

**Figure S5.** Control experiments data

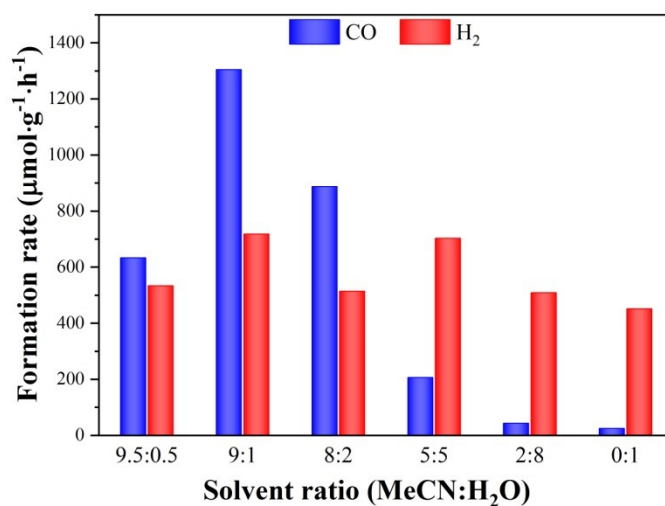

**Figure S6.** Effect of solvent ratio on the formation rate of CO and H<sub>2</sub>

**Table S2.** Comparison of catalytic performance for CO<sub>2</sub> photoreduction

| Photocatalyst                                                     | Reaction medium             | Sacrificial agent | Light Source           | P/W | <i>R</i> <sup>[a]</sup> |                | H <sub>2</sub> /CO ratio | Ref.      |
|-------------------------------------------------------------------|-----------------------------|-------------------|------------------------|-----|-------------------------|----------------|--------------------------|-----------|
|                                                                   |                             |                   |                        |     | CO                      | H <sub>2</sub> |                          |           |
| ZnIn <sub>2</sub> S <sub>4</sub> /NH-SiO <sub>2</sub>             | MeCN:H <sub>2</sub> O (9:1) | TEA,              | LEDs (455 nm)          | 9   | 1304.8                  | 718.4          | <b>0.55</b>              | This work |
| ZnIn <sub>2</sub> S <sub>4</sub> -ZnAlO <sub>x</sub>              | MeCN:H <sub>2</sub> O (9:1) | TEA               | LEDs (455 nm)          | 9   | 1100.5                  | 706.1          | 0.64                     | 1         |
| g-C <sub>3</sub> N <sub>4</sub> /ZnIn <sub>2</sub> S <sub>4</sub> | MeCN:H <sub>2</sub> O (3:2) | TEOA              | Xe-arc lamp (λ>420 nm) | 300 | 1453                    | 863            | 0.59                     | 2         |
| CeO <sub>x</sub> -S/ZnIn <sub>2</sub> S <sub>4</sub>              | MeCN:H <sub>2</sub> O (1:1) | TEA               | LEDs (455 nm)          | 9   | 180                     | 500            | 2.78                     | 3         |
| One-unit-cell ZnIn <sub>2</sub> S <sub>4</sub>                    | H <sub>2</sub> O            | -                 | Xe-arc lamp            | 300 | 33.2                    | -              | -                        | 4         |
| ZnAl-LDH                                                          | H <sub>2</sub> O            | -                 | Xe-arc lamp            | 300 | 7.6                     | -              | -                        | 5         |
| g-C <sub>3</sub> N <sub>4</sub> /Bi <sub>2</sub> WO <sub>6</sub>  | H <sub>2</sub> O            | -                 | Xe-arc lamp            | 300 | 5.19                    | -              | -                        | 6         |
| Cu/CeO <sub>2-x</sub>                                             | H <sub>2</sub> O            | -                 | Xe-arc lamp            | 300 | 1.65                    | -              | -                        | 7         |

[a] Formation rate of the products, in μmol·g<sup>-1</sup>·h<sup>-1</sup>.

## Supplementary Reference

1. Y. Shao, X. Wang, Z. Dou, X. Liang, X. Zhang, M. Pang, Q. Xu, M. Ji and M. Wang, *Catal. Sci. Technol.*, 2021, **11**, 3422-3427.
2. K. Chen, X. Wang, Q. Li, Y.-N. Feng, F.-F. Chen and Y. Yu, *Chem. Eng. J.*, 2021, **418**, 129476.
3. T. T. Hou, N. C. Luo, Y. T. Cui, J. M. Lu, L. Li, K. E. MacArthur, M. Heggen, R. T. Chen, F. T. Fan, W. M. Tian, S. Y. Jin and F. Wang, *Appl. Catal. B*, 2019, **245**, 262-270.
4. X. C. Jiao, Z. W. Chen, X. D. Li, Y. F. Sun, S. Gao, W. S. Yan, C. M. Wang, Q. Zhang, Y. Lin, Y. Luo and Y. Xie, *J. Am. Chem. Soc.*, 2017, **139**, 7586-7594.
5. Y. Zhao, G. Chen, T. Bian, C. Zhou, G. I. N. Waterhouse, L.-Z. Wu, C.-H. Tung, L. J. Smith, D. O'Hare and T. Zhang, *Adv. Mater.*, 2015, **27**, 7824-7831.
6. M. Li, L. Zhang, X. Fan, Y. Zhou, M. Wu and J. Shi, *J. Mater. Chem. A*, 2015, **3**, 5189-5196.
7. M. Wang, M. Shen, X. Jin, J. Tian, M. Li, Y. Zhou, L. Zhang, Y. Li and J. Shi, *ACS Catal.*, 2019, **9**, 4573-4581.
